# Supplementary material for: In vivo 31P magnetic resonance spectroscopy study of mouse cerebral NAD content and redox state during neurodevelopment
Source: PubMed Central journal article supplement (PMC7519085; doi:10.1038/s41598-020-72492-8), 2020-09-24
Supplement: 41598_2020_72492_MOESM1_ESM.pdf [file 41598_2020_72492_MOESM1_ESM.pdf]

## Supporting Information

### In vivo $^{31}\text{P}$ magnetic resonance spectroscopy study of mouse cerebral NAD content and redox state during neurodevelopment

Radek Skupiński<sup>1,2</sup>, Kim Q Do<sup>1</sup> and Lijing Xin<sup>2</sup>

<sup>1</sup>Center for Psychiatric Neuroscience, Department of Psychiatry, Lausanne University Hospital (CHUV), Prilly, Switzerland,

<sup>2</sup>Center for Biomedical Imaging (CIBM), Ecole Polytechnique Fédérale de Lausanne, Lausanne, Switzerland,

**Table S1:** Concentration [mM] of  $\text{NAD}^+$ , NADH and their ratio used in different phantoms for method validation. Inorganic phosphate (Pi) concentration of 9.57 mM was used as an internal reference for all phantom quantification.

| [ $\text{NAD}^+$ ] | [NADH] | [ $\text{NAD}^+$ ]/[NADH] |
|--------------------|--------|---------------------------|
| 1.055              | 1.180  | 0.89                      |
| 1.507              | 0.914  | 1.65                      |
| 0.251              | 0.152  | 1.65                      |
| 0.670              | 0.199  | 3.37                      |
| 1.612              | 0.293  | 5.50                      |
| 2.249              | 0.244  | 9.22                      |

**Table S2:** List of metabolite concentrations and linewidths (LW) used in the Monte-Carlo simulation, metabolite LWs extracted from summed *in vivo* spectra with 10 Hz Lorentzian apodization, and the LWs used for the basis set in LCModel.

| Metabolite        | <i>In vivo</i> | <i>In vivo</i> | Monte-Carlo | Basis set |
|-------------------|----------------|----------------|-------------|-----------|
|                   | Conc. (mM)     | LW(Hz)         | LW(Hz)      | LW(Hz)    |
| $\alpha$ -ATP     | 2.8            | 32             | 19-54       | 19.3      |
| $\beta$ -ATP      | 2.8            | 60             | 47-82       | 47.0      |
| $\gamma$ -ATP     | 2.8            | 37             | 24-59       | 23.9      |
| PCr               | 2.9            | 16             | 3-38        | 2.8       |
| MP                | 0.07           | ND             | 40-75       | 40.0      |
| Pi <sup>int</sup> | 0.54           | 13.5           | 0.5-35.5    | 0.5       |
| Pi <sup>ext</sup> | 0.057          | 20             | 7-42        | 6.9       |
| PC                | 0.25           | 22             | 9-44        | 8.6       |
| PE                | 0.58           | 23             | 10-45       | 9.9       |
| GPC               | 0.25           | 17             | 4-39        | 4.3       |
| GPE               | 0.44           | 10             | 3-38        | 3.3       |
| NAD <sup>+</sup>  | 0.40           | 30             | 17-52       | 16.9      |
| NADH              | 0.20           | 30             | 17-52       | 16.9      |
| UDPG              | 0.10           | 14             | 1-36        | 1.0       |

**Table S3:** Relative standard deviations (RSD, %) obtained from the Monte Carlo simulation data quantified by LCMoel and least square fit (Lsfit) at different SNR and LW.

| SNR | RSD (%)          |       |         |       |         |       |         |       |
|-----|------------------|-------|---------|-------|---------|-------|---------|-------|
|     | NAD <sup>+</sup> |       | NADH    |       | RR      |       | tot NAD |       |
|     | LCModel          | Lsfit | LCModel | Lsfit | LCModel | Lsfit | LCModel | Lsfit |
| 10  | 13.5             | 28.1  | 20.5    | 32.5  | 30.6    | 74.5  | 8.1     | 16.7  |
| 15  | 11.4             | 18.2  | 15.5    | 22.3  | 23.8    | 35.1  | 6.7     | 11.9  |
| 20  | 8.4              | 12.7  | 12.3    | 18.3  | 18.3    | 26.1  | 5.0     | 9.3   |
| 25  | 6.2              | 8.7   | 9.5     | 12.9  | 14.2    | 17.0  | 3.7     | 6.6   |
| 30  | 6.1              | 9.2   | 8.1     | 11.8  | 12.1    | 17.4  | 4.0     | 6.0   |
| 35  | 5.1              | 6.6   | 7.9     | 10.4  | 11.4    | 14.6  | 2.9     | 4.2   |
| 40  | 4.8              | 6.6   | 7.0     | 9.1   | 9.9     | 12.4  | 3.1     | 4.7   |
| 50  | 4.2              | 4.5   | 6.7     | 7.9   | 9.3     | 9.8   | 2.8     | 3.6   |
| 60  | 3.8              | 3.6   | 5.4     | 5.6   | 8.4     | 7.4   | 2.1     | 2.7   |
| 70  | 2.9              | 3.1   | 4.7     | 5.2   | 6.6     | 7.3   | 1.8     | 2.0   |
| 80  | 2.4              | 2.9   | 3.5     | 4.6   | 4.9     | 6.2   | 1.6     | 2.1   |
| 90  | 2.2              | 2.8   | 3.4     | 3.7   | 4.9     | 5.4   | 1.4     | 1.8   |
| 100 | 2.4              | 2.3   | 3.4     | 3.6   | 4.9     | 4.8   | 1.5     | 1.7   |

| LW <sub>PCR</sub><br>(Hz) | RSD (%)          |       |         |       |         |       |         |       |
|---------------------------|------------------|-------|---------|-------|---------|-------|---------|-------|
|                           | NAD <sup>+</sup> |       | NADH    |       | RR      |       | tot NAD |       |
|                           | LCModel          | LSfit | LCModel | LSfit | LCModel | LSfit | LCModel | LSfit |
| 2.8                       | 5.3              | 10.1  | 6.2     | 11.3  | 9.8     | 19.1  | 3.2     | 5.2   |
| 7.8                       | 6.0              | 8.6   | 8.4     | 13.0  | 12.7    | 17.3  | 3.2     | 5.7   |
| 12.8                      | 6.1              | 9.2   | 8.1     | 11.8  | 12.1    | 17.4  | 4.0     | 6.0   |
| 17.8                      | 7.2              | 8.8   | 10.4    | 13.2  | 14.4    | 18.8  | 4.6     | 6.3   |
| 22.8                      | 7.2              | 9.5   | 9.4     | 13.2  | 14.5    | 18.4  | 4.4     | 6.6   |
| 27.8                      | 5.9              | 8.8   | 11.2    | 14.9  | 15.9    | 21.9  | 4.2     | 6.1   |
| 32.8                      | 6.5              | 8.0   | 10.9    | 13.7  | 15.4    | 19.1  | 3.9     | 5.4   |
| 37.8                      | 7.0              | 9.2   | 10.3    | 15.0  | 16.2    | 23.2  | 3.9     | 5.5   |

**Table S4:** PCr levels determined from  $^1\text{H}$  MR measurement and cerebral cortex water concentrations in mouse brains at different ages. All values are in mean  $\pm$  standard deviation.

| Age (days) | [PCr] (mM)  | % Water (w/w) |
|------------|-------------|---------------|
| P20        | 3.603 0.728 | 78.9 0.42     |
| P40        | 3.300 0.892 | 77.7 0.41     |
| P90        | 2.926 0.289 | 77.1 0.39     |
| P250       | 3.319 0.563 | 77.1*         |

\*assuming water content remains stable at adulthood

**Table S5:** Levels and CRLBs of  $\text{NAD}^+$ , NADH, RR and total NAD obtained at P20, P40, P90 and P250, respectively. All values are in mean  $\pm$  standard deviation.

| Age (days) | [ $\text{NAD}^+$ ] |            | [NADH]      |            | RR          | [tNAD]      |
|------------|--------------------|------------|-------------|------------|-------------|-------------|
|            | Conc. (mM)         | CRLB (%)   | Conc. (mM)  | CRLB (%)   | (-)         | Conc. (mM)  |
| P20        | 0.376 0.065        | 10 $\pm$ 1 | 0.280 0.070 | 11 $\pm$ 2 | 1.427 0.473 | 0.656 0.098 |
| P40        | 0.434 0.133        | 9 $\pm$ 2  | 0.231 0.064 | 12 $\pm$ 3 | 1.941 0.564 | 0.665 0.178 |
| P90        | 0.389 0.149        | 10 $\pm$ 3 | 0.201 0.062 | 14 $\pm$ 3 | 2.145 1.062 | 0.590 0.156 |
| P250       | 0.421 0.128        | 9 $\pm$ 1  | 0.148 0.065 | 19 $\pm$ 5 | 3.305 1.552 | 0.569 0.155 |

**Table S6:** Levels of UDPG, NAD<sup>+</sup>, NADH, RR and total NAD obtained with inclusion of UDPG in the quantification from summed spectra at P20, P40, P90 and P250. All concentration levels are in mM.

| Age (days) | [UDPG] | [NAD <sup>+</sup> ] | [NADH] | RR    | [tNAD] |
|------------|--------|---------------------|--------|-------|--------|
| P20        | 0.147  | 0.352               | 0.194  | 2.033 | 0.545  |
| P40        | 0.185  | 0.368               | 0.155  | 2.422 | 0.523  |
| P90        | 0.125  | 0.360               | 0.108  | 3.185 | 0.468  |
| P250       | 0.206  | 0.408               | 0.043  | 8.880 | 0.451  |

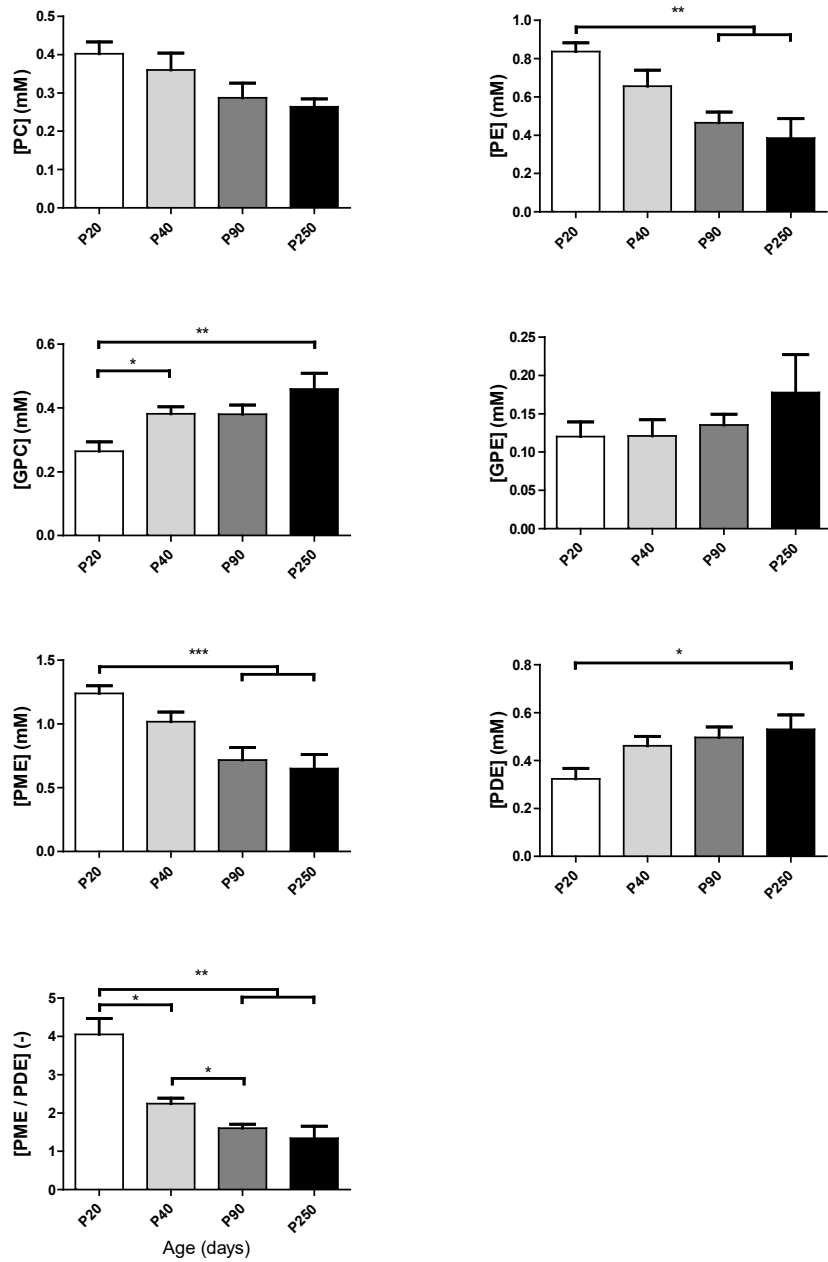

**Figure S1:** Changes of individual brain phosphoester compounds with age. Phosphomonoester (PME) is the sum of PC + PE, and phosphodiester (PDE) is the sum of GPC + GPE. The change of PME/PDE with age reflects decreased membrane turnover from postnatal day P20 to P250. All values are the mean  $\pm$  SEM and significant differences are derived from the post hoc Bonferroni correction test for multiple comparisons. \*\* $P < 0.01$ , \*\*\*\* $P < 0.0001$

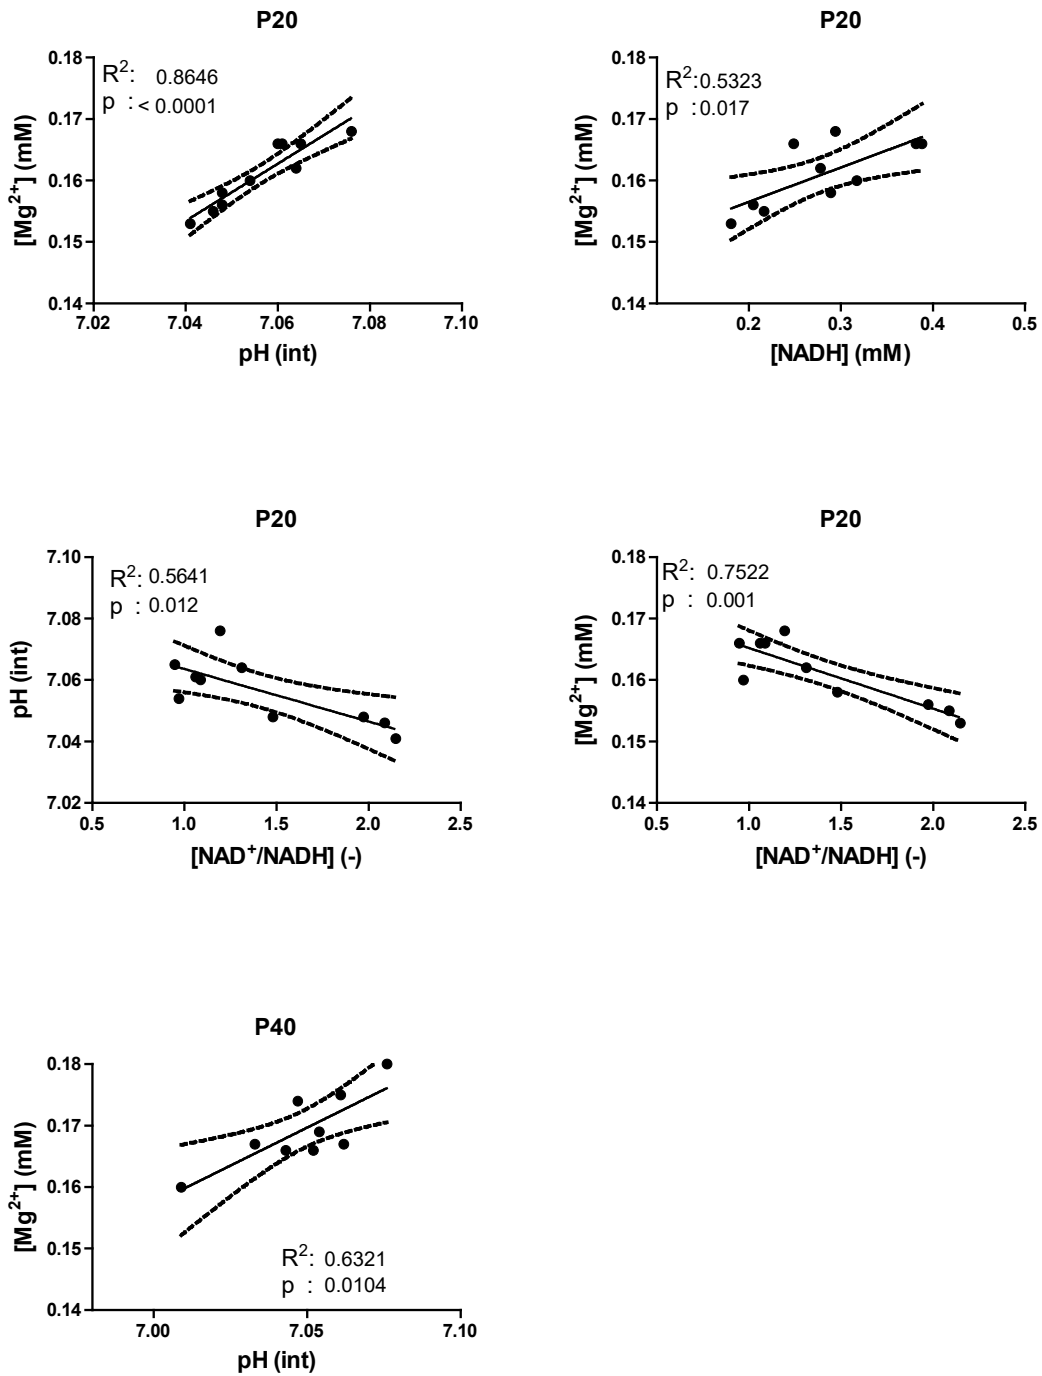

**Figure S2:** Plots of significant correlations between  $pH^{int}$ , free  $[Mg^{2+}]$  and NAD metabolites. P values are depicted together with correlation coefficients  $R^2$  obtained from the two-tailed Pearson correlation.

**Merged ages**  
P20-P40-P90-P250

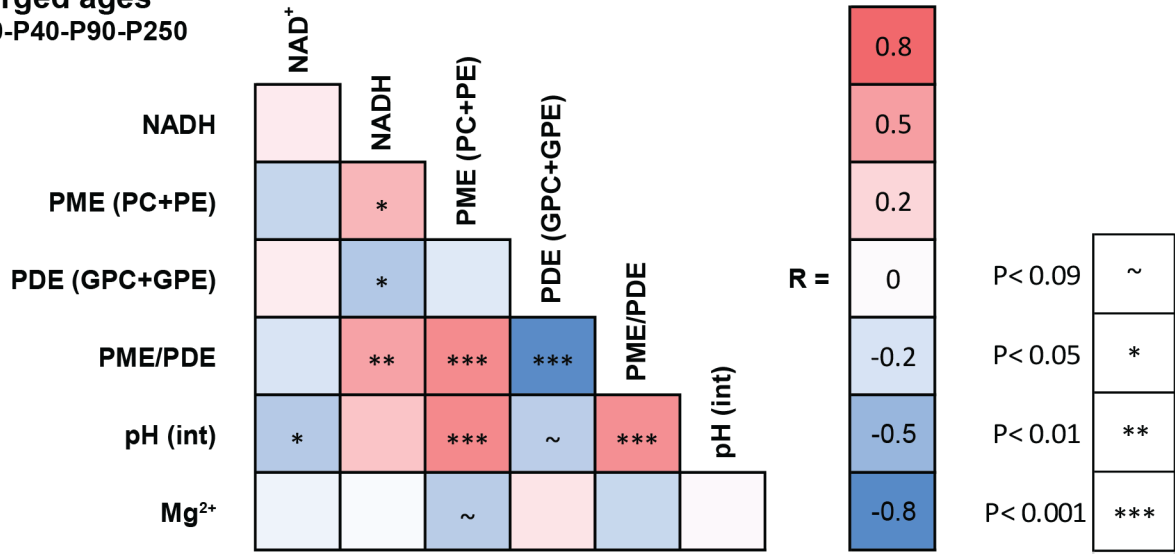

**Figure S3:** Correlation heat map of NAD<sup>+</sup>, NADH, phosphoester, pH<sup>int</sup> and free Mg<sup>2+</sup> content in the mouse brain for merged data from all ages.
